# Supplementary material for: Safety and Immunogenicity of Recombinant Bacille Calmette-Guérin Strain VPM1002 and Its Derivatives in a Goat Model
Source: MDPI journal article supplement (doi:10.3390/ijms24065509), 2023-03-14
Supplement: s1 [file s1]

## Supplementary data

**Table S1: Bacterial culture of nasal swabs of vaccinated or mock-treated goats.**

| sample     | group        | goat no. | sampling day (dpv) |   |    |      |    |      |
|------------|--------------|----------|--------------------|---|----|------|----|------|
|            |              |          | -14                | 0 | 28 | 56   | 84 | 112  |
| nasal swab | mock-treated | 0008     | -                  | - | -  | -    | -  | -    |
|            |              | 0031     | -                  | - | -  | -    | -  | -    |
|            |              | 0014     | -                  | - | -  | -    | -  | -    |
|            |              | 0023     | -                  | - | -  | cont | -  | -    |
|            |              | 0029     | -                  | - | -  | -    | -  | -    |
|            |              | 0030     | -                  | - | -  | -    | -  | -    |
|            | BCG          | 0007     | -                  | - | -  | -    | -  | -    |
|            |              | 0013     | cont               | - | -  | -    | -  | -    |
|            |              | 0015     | -                  | - | -  | -    | -  | -    |
|            |              | 0022     | -                  | - | -  | -    | -  | -    |
|            |              | 0027     | -                  | - | -  | -    | -  | -    |
|            |              | 0034     | -                  | - | -  | -    | -  | cont |
|            | VPM1002      | 0001     | -                  | - | -  | -    | -  | -    |
|            |              | 0002     | -                  | - | -  | -    | -  | -    |
|            |              | 0009     | -                  | - | -  | -    | -  | -    |
|            |              | 0016     | -                  | - | -  | -    | -  | cont |
|            |              | 0017     | -                  | - | -  | -    | -  | -    |
|            |              | 0024     | -                  | - | -  | -    | -  | -    |
|            | NUOG         | 0005     | -                  | - | -  | -    | -  | -    |
|            |              | 0006     | -                  | - | -  | -    | -  | -    |
|            |              | 0011     | -                  | - | -  | -    | -  | -    |
|            |              | 0020     | -                  | - | -  | -    | -  | -    |
|            |              | 0021     | -                  | - | -  | -    | -  | -    |
|            |              | 0026     | -                  | - | -  | -    | -  | -    |
|            | PDX          | 0003     | -                  | - | -  | -    | -  | -    |
|            |              | 0004     | -                  | - | -  | -    | -  | -    |
|            |              | 0010     | -                  | - | -  | -    | -  | -    |
|            |              | 0018     | -                  | - | -  | -    | -  | -    |
|            |              | 0019     | cont               | - | -  | -    | -  | -    |
|            |              | 0025     | -                  | - | -  | -    | -  | -    |

(- no growth, cont contaminated)

**Table S2: Mycobacterial cultures of tissue samples after necropsy of vaccinated or mock-treated goats (127 days post vaccination).**

[illegible]

|   |                                      |   |                               |      |                                  |
|---|--------------------------------------|---|-------------------------------|------|----------------------------------|
| A | Skin at vaccination site             | N | Kidney                        | -    | negative                         |
| B | Contralateral skin site              | O | <i>Ln renales</i>             | +    | <i>M. bovis</i>                  |
| C | <i>Ln cervicalis superficialis</i> L | P | Heart (rV)                    | #    | <i>M. gordonae</i>               |
| D | <i>Ln cervicalis superficialis</i> R | Q | Tonsil                        | §    | <i>M. septicum/M. peregrinum</i> |
| E | <i>Ln axillaris profundus</i> L      | R | <i>Ln retroph medialis</i>    | nd   | not done                         |
| F | <i>Ln axillaris profundus</i> R      | S | Jejunal Peyer's Patch         | cont | contaminated                     |
| G | Lung - dors. caud. lobe L            | T | Ileum                         |      |                                  |
| H | <i>Ln tracheobronchialis</i> L       | U | <i>Ln mesenterialis cran.</i> |      |                                  |
| J | <i>Lnn mediastinales</i>             | V | <i>Ln ileocolici</i>          |      |                                  |
| K | Liver                                | W | Lung lesioned                 |      |                                  |
| L | <i>Ln hepatici</i>                   | X | Bone marrow                   |      |                                  |
| M | Spleen                               |   |                               |      |                                  |

**Table S3: Primers used for Polymerase Chain Reaction (PCR)-based genotyping of VPM1002 and its derivatives and expected PCR product..**

| target | primer         | sequence (5'-3')           | product size (in bp) |      |      |
|--------|----------------|----------------------------|----------------------|------|------|
|        |                |                            | VPM1002              | PDX  | NUOG |
| LLO    | Hlynt.fw       | AATGCTGTACCAAATTTGCAATTAAT | 500                  | 500  | 500  |
|        | Hlyint.rev     | CTAAGACGCCAATCGAAAAGAAACA  |                      |      |      |
| Pdx    | Pdx1loc.fw     | ATGGATCCTGCAGGTAACCCAGC    | 900                  | 300  | 900  |
|        | Pdx1loc.rev    | ATGACCGACAGCGATCTCGTCC     |                      |      |      |
| NuoG   | nuoG-flank.fw  | CACTGACATCCGGGTAGGCC       | 2400                 | 2400 | 300  |
|        | nuoG-flank.rev | TCATGAGCCCGCTCCGAT         |                      |      |      |

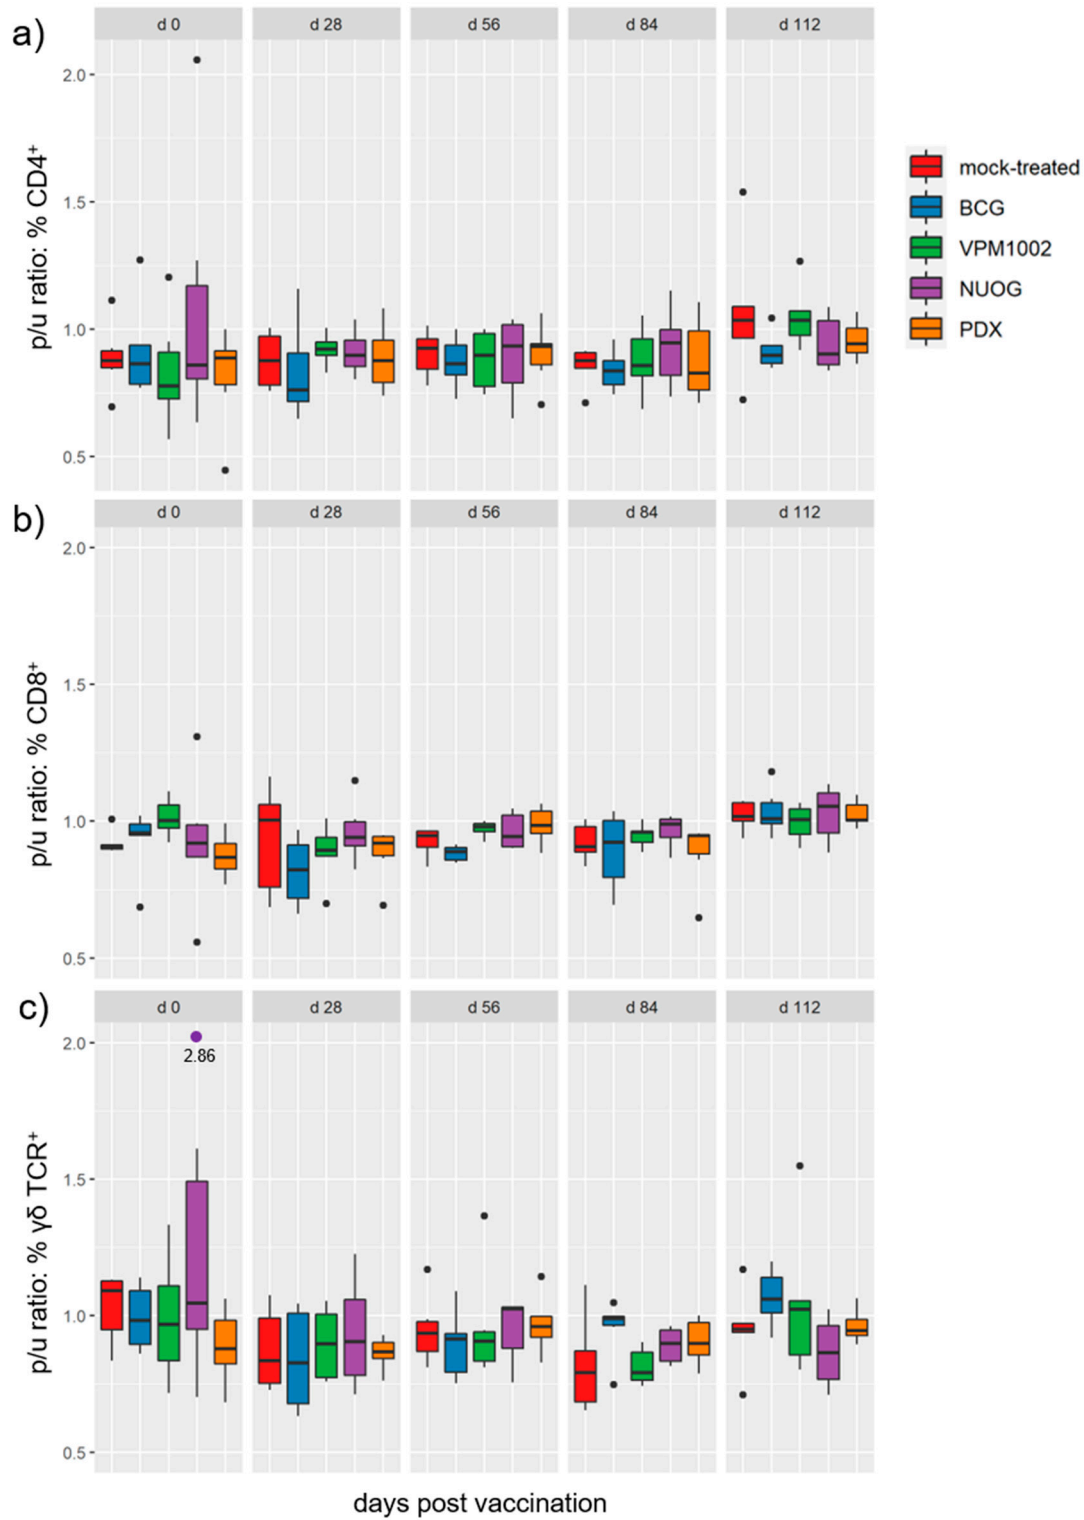

**Figure S1: Percentage of (a) CD4<sup>+</sup>, (b) CD8<sup>+</sup> and (c) γδ T cells after *in vitro* stimulation with bovine purified protein derivative (bPPD; TB antigen) of vaccinated or mock-treated goats. Box plots represent values of the p/u ratio ( $\frac{\text{bPPD stimulated}}{\text{unstimulated}}$ ). There were no significant differences between groups (Kruskal-Wallis test).**

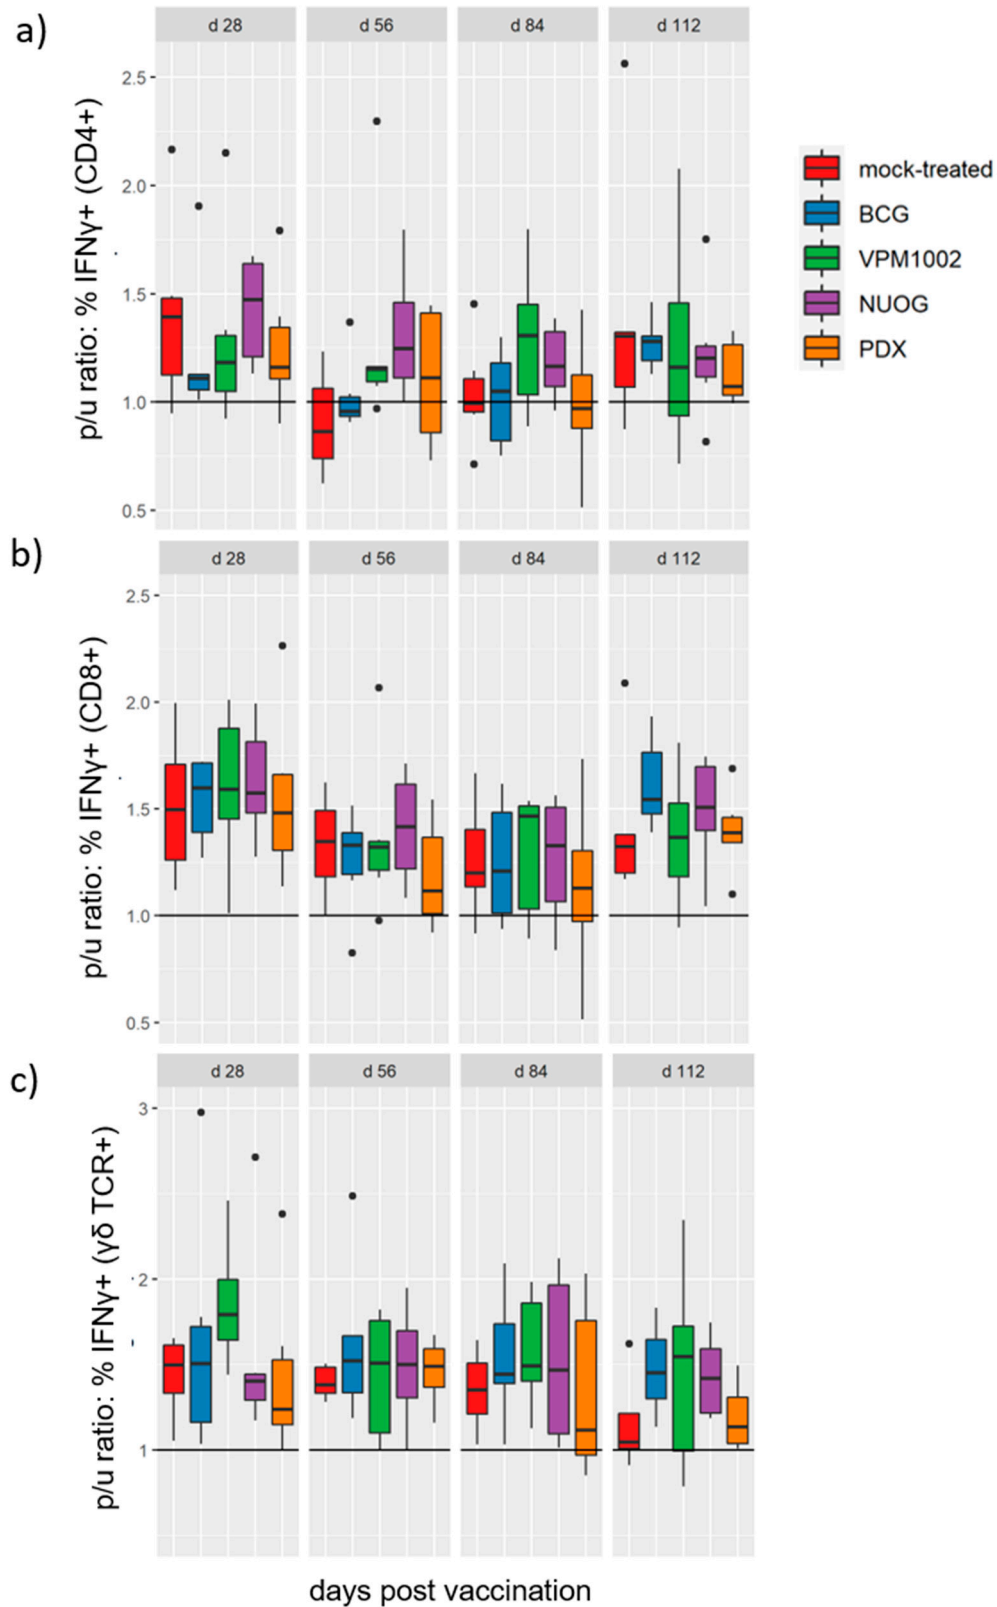

**Figure S2: Percentage of cells within major T cell subsets with detectable levels of intracellular Interferon gamma after *in vitro* stimulation with bPPD of vaccinated or mock-treated goats.** Box plots represent values of the p/u ratio ( $\frac{\text{bPPD stimulated}}{\text{unstimulated}}$ ) of % IFN- $\gamma$ + cells within the population of (a) CD4+ T cells, (b) CD8+ T cells, and (c)  $\gamma\delta$  T cells. There were no significant differences between groups (Kruskal-Wallis test).
